# Supplementary material for: Comparative measurements of ambient atmospheric concentrations of ice nucleating particles using multiple immersion freezing methods and a continuous flow diffusion chamber
Source: Copernicus journal article supplement (doi:10.5194/acp-17-11227-2017), 2017-09-22
Supplement: Supplementary file 1 [file acp-17-11227-2017-supplement.pdf]

Supplement of Atmos. Chem. Phys., 17, 11227–11245, 2017  
<https://doi.org/10.5194/acp-17-11227-2017-supplement>  
© Author(s) 2017. This work is distributed under  
the Creative Commons Attribution 3.0 License.

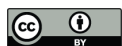

*Supplement of*

## **Comparative measurements of ambient atmospheric concentrations of ice nucleating particles using multiple immersion freezing methods and a continuous flow diffusion chamber**

**Paul J. DeMott et al.**

*Correspondence to:* Paul J. DeMott (paul.demott@Colostate.edu)

The copyright of individual parts of the supplement might differ from the CC BY 3.0 License.

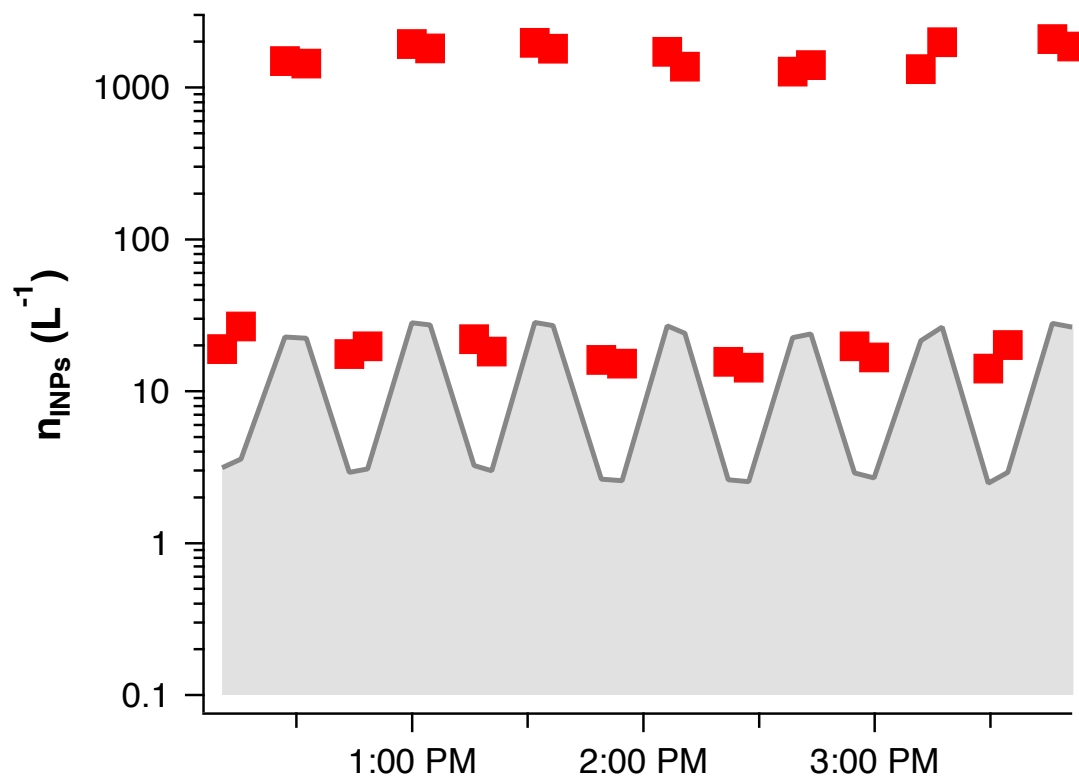

**Figure S1.** Aerosol Concentrator calibration check at  $-30^{\circ}\text{C}$  at CSU on May 19, 2016. This is a typical experimental sampling period at one temperature. In this figure, the lower data points are INP number concentrations without using the aerosol concentrator. Alternating periods of high INP number concentrations are during use of the aerosol concentrator. Inspection of the ratio between the INP number concentrations per volume of air during periods on versus off the concentrator reveal the CF factor, which is  $\sim 90$  in this case. The shaded lower region is the limit of significance for INP concentrations, as described in Section 2.1 of the manuscript.

**Table S1.** Data for Figures 3 and 4. INP concentrations and confidence limits (CL+; CL-) are in units L<sup>-1</sup>, and Temp is in °C. Concentrator (Y: On; N: Off; B: both on and off for integrated period). IS pore-size and CS pore-size or BioSampler (Bio) use are indicated.

| Date                  | Site           | Temp  | CFDC  | CFDC_CL- | CFDC_CL+ | Concentrator | IS_0.2um | IS_CL- | IS_CL+ | IS_3um | IS_CL- | IS_CL+ |
|-----------------------|----------------|-------|-------|----------|----------|--------------|----------|--------|--------|--------|--------|--------|
| 29-Sep-10             | NoCO Ag        | -19.9 | 1.40  | 0.30     | 0.20     | N            | 5.40     | 2.50   | 4.50   |        |        |        |
| 4-Oct-10              | NoCO Ag        | -20.0 | 13.20 | 0.20     | 0.20     | N            | 20.00    | 10.00  | 18.80  |        |        |        |
| 8-Oct-10              | NoCO Ag        | -20.1 | 1.10  | 0.40     | 0.40     | N            | 5.30     | 2.50   | 3.75   |        |        |        |
| 3-Nov-10              | NoCO Ag        | -20.0 | 5.90  | 1.00     | 1.00     | N            | 53.00    | 22.00  | 31.00  |        |        |        |
| 6-Sep-13              | CSU ATChem     | -18.2 | 0.34  | 0.11     | 0.11     | Y            | 2.20     | 1.20   | 2.00   | 1.90   | 0.92   | 1.80   |
| 12-Sep-13             | CSU ATChem     | -16.0 | 0.23  | 0.09     | 0.09     | Y            | 0.29     | 0.16   | 0.32   | 0.52   | 0.25   | 0.41   |
| 12-Nov-13             | CSU ATChem     | -30.5 | 98.00 | 13.00    | 12.00    | N            |          |        |        |        |        |        |
| 13-Nov-13             | CSU ATChem     | -21.8 | 12.50 | 2.50     | 3.00     | N            | 81.00    | 26.00  | 32.00  | 42.00  | 17.70  | 22.00  |
| 14-Nov-13             | CSU ATChem     | -26.8 | 21.50 | 4.50     | 4.50     | N            | 105.00   | 41.00  | 53.00  |        |        |        |
| 18-May-16             | CSU ATChem     | -20.0 | 0.25  | 0.02     | 0.02     | Y            | 0.55     | 0.27   | 0.46   |        |        |        |
| 19-May-16             | CSU ATChem     | -30.0 | 20.00 | 0.20     | 0.20     | Y            |          |        |        |        |        |        |
| 11-May-16             | CRC (all STP)  | -21.0 | 0.82  | 0.81     | 2.56     | N            | 0.29     | 0.12   | 0.18   |        |        |        |
| 11-May-16             | CRC (all STP)  | -25.0 | 1.25  | 1.4      | 1.24     | N            | 8.50     | 3.20   | 3.77   |        |        |        |
| 12-May-16             | CRC (all STP)  | -16.0 | 0.12  | 1.80     | 0.11     | N            | 0.02     | 0.01   | 0.02   |        |        |        |
| 12-May-16             | CRC (all STP)  | -21.0 | 0.51  | 1.40     | 0.51     | N            | 0.38     | 0.19   | 0.31   |        |        |        |
| 12-May-16             | CRC (all STP)  | -24.5 | 1.30  | 0.88     | 0.88     | N            | 3.40     | 1.50   | 3.00   |        |        |        |
| 12-May-16             | CRC (all STP)  | -28.5 | 5.20  | 1.30     | 1.30     | N            |          |        |        |        |        |        |
| 26-Jan-15             | BBY            | -17.5 | 0.84  | 0.74     | 0.74     | B            | 0.07     | 0.04   | 0.12   |        |        |        |
| 26-Jan-15             | BBY            | -21.0 | 0.99  | 0.81     | 0.81     | Y            | 0.12     | 0.07   | 0.14   |        |        |        |
| 26-Jan-15             | BBY            | -23.0 | 0.25  | 0.24     | 0.50     | Y            | 0.45     | 0.20   | 0.27   |        |        |        |
| 26-Jan-15             | BBY            | -24.0 | 1.64  | 0.90     | 0.90     | Y            | 0.78     | 0.33   | 0.40   |        |        |        |
| 26-Jan-15             | BBY            | -25.0 | 1.02  | 0.50     | 0.50     | Y            | 4.20     | 2.17   | 3.70   |        |        |        |
| 2-Feb-15              | BBY            | -20.0 | 0.17  | 0.16     | 0.21     | Y            | 0.05     | 0.03   | 0.02   |        |        |        |
| 2-Feb-15              | BBY            | -21.0 | 0.21  | 0.20     | 0.65     | N            | 0.06     | 0.02   | 0.03   |        |        |        |
| 2-Feb-15              | BBY            | -22.0 | 0.46  | 0.44     | 0.55     | Y            | 0.09     | 0.04   | 0.05   |        |        |        |
| 2-Feb-15              | BBY            | -24.0 | 0.59  | 0.58     | 0.76     | B            | 1.10     | 0.46   | 0.65   |        |        |        |
| 2-Feb-15              | BBY            | -25.0 | 1.19  | 0.54     | 0.54     | B            | 2.74     | 1.07   | 1.29   |        |        |        |
| 30-Apr-14             | SGP            | -21.2 | 0.84  | 0.82     | 0.82     | B            | 0.40     | 0.21   | 0.35   |        |        |        |
| 30-Apr-14             | SGP            | -27.2 | 10.59 | 4.75     | 4.75     | B            | 47.64    | 19.80  | 21.60  |        |        |        |
| 4-May-14              | SGP            | -21.6 | 2.75  | 2.40     | 2.40     | B            | 1.19     | 0.87   | 2.92   |        |        |        |
| 4-May-14              | SGP            | -24.9 | 21.05 | 8.96     | 8.96     | B            | 27.89    | 11.61  | 13.66  |        |        |        |
| 4-May-14              | SGP            | -15.0 | 0.28  | 0.13     | 0.13     | Y            | 0.08     | 0.03   | 0.03   |        |        |        |
| 5-May-14              | SGP            | -19.9 | 2.98  | 2.11     | 2.11     | B            | 0.44     | 0.22   | 0.36   |        |        |        |
| 5-May-14              | SGP            | -22.4 | 4.85  | 2.99     | 2.99     | B            | 3.03     | 2.02   | 5.43   |        |        |        |
| 5-May-14              | SGP            | -24.4 | 13.55 | 6.36     | 6.36     | N            | 40.74    | 16.75  | 20.16  |        |        |        |
| 5-May-14              | SGP            | -26.1 | 27.80 | 11.65    | 11.65    | B            | 79.55    | 39.21  | 42.74  |        |        |        |
| 5-Jun-14              | SGP            | -19.7 | 0.08  | 0.07     | 0.27     | B            | 0.30     | 0.17   | 0.33   |        |        |        |
| 7-Jun-14              | SGP            | -17.1 | 0.19  | 0.18     | 1.12     | B            | 0.22     | 0.13   | 0.27   |        |        |        |
| 7-Jun-14              | SGP            | -21.3 | 0.32  | 0.17     | 0.17     | Y            | 0.43     | 0.21   | 0.35   |        |        |        |
| 7-Jun-14              | SGP            | -25.1 | 0.61  | 0.27     | 0.27     | Y            | 4.05     | 2.03   | 2.23   |        |        |        |
| 8-Jun-14              | SGP            | -15.0 | 0.08  | 0.07     | 0.11     | Y            | 0.18     | 0.11   | 0.26   |        |        |        |
| 8-Jun-14              | SGP            | -21.8 | 0.89  | 0.88     | 1.15     | Y            | 1.30     | 0.50   | 0.65   |        |        |        |
| 30-Apr-14             | SGP            | -17.2 | 0.29  | 0.19     | 0.19     | Y            | 0.14     | 0.08   | 0.18   |        |        |        |
| 14-Oct-14             | Kansas-harvest | -18.7 | 1.63  | 0.66     | 0.66     | Y            | 1.10     | 0.49   | 0.75   |        |        |        |
| 14-Oct-14             | Kansas-harvest | -24.3 | 6.43  | 2.58     | 2.58     | Y            | 69.00    | 26.40  | 31.90  |        |        |        |
| 14-Oct-14             | Kansas-harvest | -29.2 | 12.06 | 5.12     | 5.12     | Y            |          |        |        |        |        |        |
| 15-Oct-14             | Kansas-harvest | -17.2 | 3.00  | 1.84     | 1.84     | Y            | 0.57     | 0.31   | 0.63   |        |        |        |
| 15-Oct-14             | Kansas-harvest | -22.6 | 1.74  | 0.91     | 0.91     | Y            | 21.00    | 10.10  | 16.50  |        |        |        |
| 15-Oct-14             | Kansas-harvest | -27.1 | 7.29  | 2.93     | 2.93     | Y            |          |        |        |        |        |        |
| 10/15/2014-10/16/2014 | Kansas         | -18.2 | 0.26  | 0.12     | 0.12     | Y            | 1.20     | 0.62   | 1.13   |        |        |        |
| 10/15/2014-10/16/2014 | Kansas         | -21.6 | 0.29  | 0.14     | 0.14     | Y            | 4.70     | 1.99   | 2.49   |        |        |        |
| 10/15/2014-10/16/2014 | Kansas         | -25.0 | 2.12  | 1.94     | 1.94     | Y            | 77.03    | 30.88  | 39.60  |        |        |        |
| 14-Oct-14             | Kansas         | -17.7 | 0.49  | 0.48     | 1.00     | Y            | 0.19     | 0.11   | 0.23   |        |        |        |
| 14-Oct-14             | Kansas         | -20.9 | 0.97  | 0.97     | 0.98     | Y            | 2.10     | 1.32   | 3.14   |        |        |        |
| 14-Oct-14             | Kansas         | -24.8 | 4.54  | 3.59     | 3.59     | Y            | 55.00    | 25.90  | 27.70  |        |        |        |
| 14-Oct-14             | Kansas         | -30.7 | 7.84  | 4.35     | 4.35     | Y            |          |        |        |        |        |        |
| 17-Aug-11             | MEFO           | -25.0 | 3.92  | 1.22     | 1.22     | Y            |          |        |        |        |        |        |
| 17-Aug-11             | MEFO           | -25.0 | 4.26  | 2.48     | 2.48     | Y            |          |        |        |        |        |        |
| 18-Aug-11             | MEFO           | -20.3 | 0.43  | 0.30     | 0.30     | Y            |          |        |        |        |        |        |

**Table S1.** (continued)

| Date                  | Site           | Temp  | IS-Biosamp | IS_CL- | IS_CL+CS_0.2um | CS_CL- | CS_CL+CS_3um | CS_CL-  | CS_CL+ |        |         |
|-----------------------|----------------|-------|------------|--------|----------------|--------|--------------|---------|--------|--------|---------|
| 29-Sep-10             | NoCO Ag        | -19.9 |            |        |                |        |              |         |        |        |         |
| 4-Oct-10              | NoCO Ag        | -20.0 |            |        |                |        |              |         |        |        |         |
| 8-Oct-10              | NoCO Ag        | -20.1 |            |        |                |        |              |         |        |        |         |
| 3-Nov-10              | NoCO Ag        | -20.0 |            |        |                |        |              |         |        |        |         |
| 6-Sep-13              | CSU ATChem     | -18.2 | 0.80       | 0.35   | 0.55           | 2.02   | 1.25         | 3.26    | 1.20   | 0.88   | 2.86    |
| 12-Sep-13             | CSU ATChem     | -16.0 | 0.26       | 0.17   | 0.46           |        |              |         |        |        |         |
| 12-Nov-13             | CSU ATChem     | -30.5 |            |        |                | 624.06 | 443.30       | 1250.50 | 752.79 | 548.80 | 1348.50 |
| 13-Nov-13             | CSU ATChem     | -21.8 | 40.00      | 19.00  | 21.00          | 42.90  | 27.30        | 75.30   | 42.40  | 29.70  | 98.90   |
| 14-Nov-13             | CSU ATChem     | -26.8 | 105.00     | 40.50  | 52.30          |        |              |         |        |        |         |
| 18-May-16             | CSU ATChem     | -20.0 |            |        |                |        |              |         |        |        |         |
| 19-May-16             | CSU ATChem     | -30.0 |            |        |                |        |              |         |        |        |         |
| 11-May-16             | CRC (all STP)  | -21.0 |            |        |                |        |              |         |        |        |         |
| 11-May-16             | CRC (all STP)  | -25.0 |            |        |                |        |              |         |        |        |         |
| 12-May-16             | CRC (all STP)  | -16.0 |            |        |                |        |              |         |        |        |         |
| 12-May-16             | CRC (all STP)  | -21.0 |            |        |                |        |              |         |        |        |         |
| 12-May-16             | CRC (all STP)  | -24.5 |            |        |                |        |              |         |        |        |         |
| 12-May-16             | CRC (all STP)  | -28.5 |            |        |                |        |              |         |        |        |         |
| 26-Jan-15             | BBY            | -17.5 |            |        |                |        |              |         |        |        |         |
| 26-Jan-15             | BBY            | -21.0 |            |        |                |        |              |         |        |        |         |
| 26-Jan-15             | BBY            | -23.0 |            |        |                |        |              |         |        |        |         |
| 26-Jan-15             | BBY            | -24.0 |            |        |                |        |              |         |        |        |         |
| 26-Jan-15             | BBY            | -25.0 |            |        |                |        |              |         |        |        |         |
| 2-Feb-15              | BBY            | -20.0 |            |        |                |        |              |         |        |        |         |
| 2-Feb-15              | BBY            | -21.0 |            |        |                |        |              |         |        |        |         |
| 2-Feb-15              | BBY            | -22.0 |            |        |                |        |              |         |        |        |         |
| 2-Feb-15              | BBY            | -24.0 |            |        |                |        |              |         |        |        |         |
| 2-Feb-15              | BBY            | -25.0 |            |        |                |        |              |         |        |        |         |
| 30-Apr-14             | SGP            | -21.2 |            |        |                |        |              |         |        |        |         |
| 30-Apr-14             | SGP            | -27.2 |            |        |                |        |              |         |        |        |         |
| 4-May-14              | SGP            | -21.6 |            |        |                |        |              |         |        |        |         |
| 4-May-14              | SGP            | -24.9 |            |        |                |        |              |         |        |        |         |
| 4-May-14              | SGP            | -15.0 |            |        |                |        |              |         |        |        |         |
| 5-May-14              | SGP            | -19.9 |            |        |                |        |              |         |        |        |         |
| 5-May-14              | SGP            | -22.4 |            |        |                |        |              |         |        |        |         |
| 5-May-14              | SGP            | -24.4 |            |        |                |        |              |         |        |        |         |
| 5-May-14              | SGP            | -26.1 |            |        |                |        |              |         |        |        |         |
| 5-Jun-14              | SGP            | -19.7 |            |        |                |        |              |         |        |        |         |
| 7-Jun-14              | SGP            | -17.1 |            |        |                |        |              |         |        |        |         |
| 7-Jun-14              | SGP            | -21.3 |            |        |                |        |              |         |        |        |         |
| 7-Jun-14              | SGP            | -25.1 |            |        |                |        |              |         |        |        |         |
| 8-Jun-14              | SGP            | -15.0 |            |        |                |        |              |         |        |        |         |
| 8-Jun-14              | SGP            | -21.8 |            |        |                |        |              |         |        |        |         |
| 30-Apr-14             | SGP            | -17.2 |            |        |                |        |              |         |        |        |         |
| 14-Oct-14             | Kansas-harvest | -18.7 |            |        |                |        |              |         |        |        |         |
| 14-Oct-14             | Kansas-harvest | -24.3 |            |        |                |        |              |         |        |        |         |
| 14-Oct-14             | Kansas-harvest | -29.2 |            |        |                |        |              |         |        |        |         |
| 15-Oct-14             | Kansas-harvest | -17.2 |            |        |                |        |              |         |        |        |         |
| 15-Oct-14             | Kansas-harvest | -22.6 |            |        |                |        |              |         |        |        |         |
| 15-Oct-14             | Kansas-harvest | -27.1 |            |        |                |        |              |         |        |        |         |
| 10/15/2014-10/16/2014 | Kansas         | -18.2 |            |        |                |        |              |         |        |        |         |
| 10/15/2014-10/16/2014 | Kansas         | -21.6 |            |        |                |        |              |         |        |        |         |
| 10/15/2014-10/16/2014 | Kansas         | -25.0 |            |        |                |        |              |         |        |        |         |
| 14-Oct-14             | Kansas         | -17.7 |            |        |                |        |              |         |        |        |         |
| 14-Oct-14             | Kansas         | -20.9 |            |        |                |        |              |         |        |        |         |
| 14-Oct-14             | Kansas         | -24.8 |            |        |                |        |              |         |        |        |         |
| 14-Oct-14             | Kansas         | -30.7 |            |        |                |        |              |         |        |        |         |
| 17-Aug-11             | MEFO           | -25.0 |            |        |                |        |              |         |        |        |         |
| 17-Aug-11             | MEFO           | -25.0 |            |        |                |        |              |         |        |        |         |
| 18-Aug-11             | MEFO           | -20.3 |            |        |                |        |              |         |        |        |         |

**Table S1. (continued)**

| Date                  | Site           | Temp  | CS_Biosamp | CS_CL- | CS_CL+  | DFT_all | DFT_CLDFT_size | DFT_CL | CRAFT | CRAFT_CL- | CRAFT_CL+ |
|-----------------------|----------------|-------|------------|--------|---------|---------|----------------|--------|-------|-----------|-----------|
| 29-Sep-10             | NoCO Ag        | -19.9 |            |        |         |         |                |        |       |           |           |
| 4-Oct-10              | NoCO Ag        | -20.0 |            |        |         |         |                |        |       |           |           |
| 8-Oct-10              | NoCO Ag        | -20.1 |            |        |         |         |                |        |       |           |           |
| 3-Nov-10              | NoCO Ag        | -20.0 |            |        |         |         |                |        |       |           |           |
| 6-Sep-13              | CSU ATChem     | -18.2 | 1.98       | 1.12   | 2.60    |         |                |        |       |           |           |
| 12-Sep-13             | CSU ATChem     | -16.0 |            |        |         |         |                |        |       |           |           |
| 12-Nov-13             | CSU ATChem     | -30.5 | 1281.00    | 884.00 | 2389.00 |         |                |        |       |           |           |
| 13-Nov-13             | CSU ATChem     | -21.8 | 69.60      | 45.80  | 134.30  | 4.59    | 3.49           | 4.12   | 3.47  |           |           |
| 14-Nov-13             | CSU ATChem     | -26.8 | 238.00     | 168.70 | 579.00  | 28.10   | 11.10          | 25.20  | 11.10 |           |           |
| 18-May-16             | CSU ATChem     | -20.0 |            |        |         |         |                |        | 0.46  | 0.34      | 1.17      |
| 19-May-16             | CSU ATChem     | -30.0 |            |        |         |         |                |        | 188.2 | 59.4      | 68        |
| 11-May-16             | CRC (all STP)  | -21.0 |            |        |         |         |                |        | 0.5   | 0.34      | 1.17      |
| 11-May-16             | CRC (all STP)  | -25.0 |            |        |         |         |                |        | 7     | 4.7       | 13        |
| 12-May-16             | CRC (all STP)  | -16.0 |            |        |         |         |                |        | 0.03  | 0.013     | 0.021     |
| 12-May-16             | CRC (all STP)  | -21.0 |            |        |         |         |                |        | 0.7   | 0.5       | 1.3       |
| 12-May-16             | CRC (all STP)  | -24.5 |            |        |         |         |                |        | 4.7   | 1.8       | 2.7       |
| 12-May-16             | CRC (all STP)  | -28.5 |            |        |         |         |                |        | 54    | 20        | 29        |
| 26-Jan-15             | BBY            | -17.5 | 0.24       | 0.12   | 0.24    |         |                |        |       |           |           |
| 26-Jan-15             | BBY            | -21.0 | 0.72       | 0.46   | 1.28    |         |                |        |       |           |           |
| 26-Jan-15             | BBY            | -23.0 | 2.22       | 1.35   | 3.45    |         |                |        |       |           |           |
| 26-Jan-15             | BBY            | -24.0 | 5.76       | 3.66   | 10.06   |         |                |        |       |           |           |
| 26-Jan-15             | BBY            | -25.0 | 14.56      | 8.92   | 23.02   |         |                |        |       |           |           |
| 2-Feb-15              | BBY            | -20.0 | 0.14       | 0.09   | 0.36    |         |                |        |       |           |           |
| 2-Feb-15              | BBY            | -21.0 | 0.53       | 0.3    | 0.72    |         |                |        |       |           |           |
| 2-Feb-15              | BBY            | -22.0 | 0.99       | 0.58   | 1.42    |         |                |        |       |           |           |
| 2-Feb-15              | BBY            | -24.0 | 2.39       | 1.57   | 4.57    |         |                |        |       |           |           |
| 2-Feb-15              | BBY            | -25.0 | 7.66       | 4.96   | 14.04   |         |                |        |       |           |           |
| 30-Apr-14             | SGP            | -21.2 |            |        |         |         |                |        |       |           |           |
| 30-Apr-14             | SGP            | -27.2 |            |        |         |         |                |        |       |           |           |
| 4-May-14              | SGP            | -21.6 |            |        |         |         |                |        |       |           |           |
| 4-May-14              | SGP            | -24.9 |            |        |         |         |                |        |       |           |           |
| 4-May-14              | SGP            | -15.0 |            |        |         |         |                |        |       |           |           |
| 5-May-14              | SGP            | -19.9 |            |        |         |         |                |        |       |           |           |
| 5-May-14              | SGP            | -22.4 |            |        |         |         |                |        |       |           |           |
| 5-May-14              | SGP            | -24.4 |            |        |         |         |                |        |       |           |           |
| 5-May-14              | SGP            | -26.1 |            |        |         |         |                |        |       |           |           |
| 5-Jun-14              | SGP            | -19.7 |            |        |         |         |                |        |       |           |           |
| 7-Jun-14              | SGP            | -17.1 |            |        |         |         |                |        |       |           |           |
| 7-Jun-14              | SGP            | -21.3 |            |        |         |         |                |        |       |           |           |
| 7-Jun-14              | SGP            | -25.1 |            |        |         |         |                |        |       |           |           |
| 8-Jun-14              | SGP            | -15.0 |            |        |         |         |                |        |       |           |           |
| 8-Jun-14              | SGP            | -21.8 |            |        |         |         |                |        |       |           |           |
| 30-Apr-14             | SGP            | -17.2 |            |        |         |         |                |        |       |           |           |
| 14-Oct-14             | Kansas-harvest | -18.7 |            |        |         | 0.70    | 0.50           | 0.50   | 0.30  |           |           |
| 14-Oct-14             | Kansas-harvest | -24.3 |            |        |         | 8.90    | 2.90           | 4.10   | 1.40  |           |           |
| 14-Oct-14             | Kansas-harvest | -29.2 |            |        |         | 68.50   | 23.50          | 32.30  | 11.00 |           |           |
| 15-Oct-14             | Kansas-harvest | -17.2 |            |        |         | 1.40    | 1.00           | 0.25   | 0.24  |           |           |
| 15-Oct-14             | Kansas-harvest | -22.6 |            |        |         | 2.10    | 1.40           | 0.34   | 0.32  |           |           |
| 15-Oct-14             | Kansas-harvest | -27.1 |            |        |         | 23.30   | 6.60           | 10.70  | 2.90  |           |           |
| 10/15/2014-10/16/2014 | Kansas         | -18.2 |            |        |         | 0.26    | 0.24           |        |       |           |           |
| 10/15/2014-10/16/2014 | Kansas         | -21.6 |            |        |         | 1.40    | 0.80           | 0.35   | 0.20  |           |           |
| 10/15/2014-10/16/2014 | Kansas         | -25.0 |            |        |         | 5.40    | 2.00           | 2.40   | 0.80  |           |           |
| 14-Oct-14             | Kansas         | -17.7 |            |        |         | 0.90    | 0.50           | 0.80   | 0.50  |           |           |
| 14-Oct-14             | Kansas         | -20.9 |            |        |         | 1.30    | 0.80           | 1.10   | 0.70  |           |           |
| 14-Oct-14             | Kansas         | -24.8 |            |        |         | 4.50    | 1.90           | 2.40   | 0.90  |           |           |
| 14-Oct-14             | Kansas         | -30.7 |            |        |         | 60.80   | 28.10          | 16.00  | 4.50  |           |           |
| 17-Aug-11             | MEFO           | -25.0 |            |        |         |         |                | 8.60   | 5.35  |           |           |
| 17-Aug-11             | MEFO           | -25.0 |            |        |         |         |                | 0.8    | 0.40  |           |           |
| 18-Aug-11             | MEFO           | -20.3 |            |        |         |         |                | 0.1    | 0.04  |           |           |

**Table S2.** Data for Figure 5. Instrument name column data and positive (+) and negative (-) confidence intervals are INP concentrations in L<sup>-1</sup>, and T is in °C. “Bio” indicates use of the BioSampler, while all other samples used 0.2 μm pore size filters for collections.

| Location                 | Date             | T           | CS     | CS+     | CS-     | IS      | IS+    | IS-         | LOG(CS/IS) |
|--------------------------|------------------|-------------|--------|---------|---------|---------|--------|-------------|------------|
| BBY                      | 1/26/15          | -17.5       | 0.240  | 0.240   | 0.120   | 0.070   | 0.118  | 0.044       | 0.535      |
|                          |                  | -21.0       | 0.720  | 1.280   | 0.460   | 0.116   | 0.141  | 0.068       | 0.794      |
|                          |                  | -23.0       | 2.220  | 3.450   | 1.350   | 0.450   | 0.270  | 0.197       | 0.693      |
|                          |                  | -24.0       | 5.760  | 10.060  | 3.660   | 0.780   | 0.403  | 0.329       | 0.868      |
|                          |                  | -25.0       | 14.560 | 23.020  | 8.920   | 4.200   | 3.702  | 2.171       | 0.540      |
| BBY                      | 2/2/15           | -20.0       | 0.140  | 0.360   | 0.090   | 0.050   | 0.021  | 0.031       | 0.448      |
|                          |                  | -21.0       | 0.530  | 0.720   | 0.300   | 0.060   | 0.034  | 0.025       | 0.945      |
|                          |                  | -22.0       | 0.990  | 1.420   | 0.580   | 0.093   | 0.045  | 0.035       | 1.028      |
|                          |                  | -24.0       | 2.390  | 4.570   | 1.570   | 1.098   | 0.654  | 0.457       | 0.338      |
|                          |                  | -25.0       | 7.660  | 14.040  | 4.960   | 2.736   | 1.290  | 1.074       | 0.447      |
| Kansas                   | 14-Oct-14        | T MOUDI-DFT | DFT+   | DFT-    | IS      | IS+     | IS-    | LOG(DFT/IS) |            |
|                          |                  | -15.0       | 0.210  | 0.200   | 0.200   | 0.078   | 0.191  | 0.057       | 0.428      |
|                          |                  | -16.0       | 0.210  | 0.200   | 0.200   | 0.078   | 0.191  | 0.057       | 0.428      |
|                          |                  | -17.0       | 0.550  | 0.460   | 0.460   | 0.078   | 0.191  | 0.057       | 0.846      |
|                          |                  | -18.0       | 0.900  | 0.500   | 0.500   | 0.210   | 0.257  | 0.123       | 0.631      |
|                          |                  | -19.0       | 1.040  | 0.500   | 0.500   | 0.624   | 0.418  | 0.284       | 0.222      |
|                          |                  | -20.0       | 1.110  | 0.640   | 0.640   | 1.613   | 0.823  | 0.690       | -0.162     |
|                          |                  | -20.5       | 1.190  | 0.700   | 0.700   | 2.237   | 1.153  | 1.019       | -0.274     |
|                          |                  | -20.0       | 1.100  | 0.640   | 0.640   | 1.772   | 3.220  | 1.179       | -0.207     |
|                          |                  | -20.5       | 1.190  | 0.700   | 0.700   | 2.404   | 3.527  | 1.486       | -0.305     |
|                          |                  | -21.0       | 1.750  | 0.890   | 0.890   | 2.404   | 3.527  | 1.486       | -0.138     |
|                          |                  | -21.5       | 1.840  | 0.920   | 0.920   | 3.738   | 4.103  | 2.062       | -0.308     |
|                          |                  | -22.0       | 2.260  | 1.100   | 1.100   | 4.608   | 4.533  | 2.430       | -0.309     |
|                          |                  | -22.5       | 2.690  | 1.230   | 1.230   | 7.012   | 5.417  | 3.313       | -0.416     |
|                          |                  | -23.0       | 3.300  | 1.380   | 1.380   | 13.069  | 7.461  | 5.358       | -0.598     |
| -23.5                    | 4.450            | 1.930       | 1.930  | 20.369  | 9.943   | 7.839   | -0.661 |             |            |
| -24.0                    | 4.590            | 1.940       | 1.940  | 36.865  | 16.591  | 14.488  | -0.905 |             |            |
| -24.5                    | 6.560            | 2.850       | 2.850  | 61.823  | 31.151  | 29.048  | -0.974 |             |            |
| Kansas                   | 10/1514-10/16/14 | T MOUDI-DFT | DFT+   | DFT-    | IS      | IS+     | IS-    | LOG(DFT/IS) |            |
|                          |                  | -8.0        | 0.070  | 0.067   | 0.067   | 0.059   | 0.056  | 0.031       | 0.074      |
|                          |                  | -9.0        | 0.100  | 0.100   | 0.100   | 0.104   | 0.074  | 0.049       | 0.000      |
|                          |                  | -10.0       | 0.100  | 0.100   | 0.100   | 0.132   | 0.084  | 0.059       | -0.114     |
|                          |                  | -11.0       | 0.150  | 0.140   | 0.140   | 0.186   | 0.105  | 0.080       | -0.103     |
|                          |                  | -12.0       | 0.150  | 0.150   | 0.150   | 0.186   | 0.105  | 0.080       | -0.094     |
|                          |                  | -13.0       | 0.170  | 0.150   | 0.150   | 0.235   | 0.125  | 0.099       | -0.141     |
|                          |                  | -14.0       | 0.170  | 0.150   | 0.150   | 0.266   | 0.138  | 0.113       | -0.195     |
|                          |                  | -15.0       | 0.170  | 0.150   | 0.150   | 0.353   | 0.179  | 0.154       | -0.317     |
|                          |                  | -16.0       | 0.200  | 0.180   | 0.180   | 0.422   | 0.217  | 0.192       | -0.324     |
|                          |                  | -17.0       | 0.250  | 0.220   | 0.220   | 0.539   | 0.293  | 0.268       | -0.334     |
|                          |                  | -18.0       | 0.270  | 0.250   | 0.250   | 1.170   | 1.126  | 0.622       | -0.637     |
|                          |                  | -19.0       | 0.620  | 0.420   | 0.420   | 1.376   | 1.207  | 0.704       | -0.346     |
|                          |                  | -20.0       | 0.760  | 0.460   | 0.460   | 1.829   | 1.381  | 0.877       | -0.381     |
|                          |                  | -21.0       | 1.160  | 0.660   | 0.660   | 3.728   | 2.096  | 1.592       | -0.507     |
| -22.0                    | 1.570            | 0.800       | 0.800  | 10.640  | 5.867   | 5.343   | -0.831 |             |            |
| -23.0                    | 2.260            | 1.100       | 1.100  | 23.274  | 19.293  | 11.364  | -1.013 |             |            |
| -24.0                    | 3.140            | 1.200       | 1.200  | 53.948  | 29.684  | 21.755  | -1.235 |             |            |
| -25.0                    | 5.610            | 2.100       | 2.100  | 77.026  | 39.603  | 30.877  | -1.138 |             |            |
| -26.0                    | 7.570            | 2.600       | 2.600  | 179.101 | 87.033  | 78.307  | -1.376 |             |            |
| Kansas<br>harvest<br>soy | 14-Oct-14        | T MOUDI-DFT | DFT+   | DFT-    | IS      | IS+     | IS-    | LOG(DFT/IS) |            |
|                          |                  | -16.0       | 0.230  | 0.230   | 0.230   | 0.265   | 0.117  | 0.103       | -0.061     |
|                          |                  | -17.0       | 0.520  | 0.300   | 0.300   | 0.301   | 0.135  | 0.121       | 0.237      |
|                          |                  | -18.0       | 0.720  | 0.400   | 0.400   | 0.732   | 0.659  | 0.370       | -0.007     |
|                          |                  | -19.0       | 0.720  | 0.550   | 0.550   | 1.196   | 0.822  | 0.533       | -0.220     |
|                          |                  | -20.0       | 0.820  | 0.630   | 0.630   | 2.960   | 1.411  | 1.122       | -0.558     |
|                          |                  | -21.0       | 1.040  | 0.670   | 0.670   | 6.797   | 9.973  | 4.202       | -0.815     |
|                          |                  | -22.0       | 2.180  | 1.010   | 1.010   | 8.648   | 10.799 | 5.028       | -0.598     |
|                          |                  | -23.0       | 4.140  | 1.560   | 1.560   | 35.281  | 20.186 | 14.416      | -0.931     |
|                          |                  | -24.0       | 8.430  | 2.880   | 2.880   | 76.000  | 34.812 | 28.865      | -0.955     |
| -25.0                    | 12.850           | 3.820       | 3.820  | 180.000 | 223.096 | 104.167 | -1.146 |             |            |
| -26.0                    | 25.000           | 7.150       | 7.150  | 220.000 | 239.811 | 120.883 | -0.944 |             |            |

**Table S2. (continued)**

|                              |           |       |           |        |        |         |         |         |               |        |        |
|------------------------------|-----------|-------|-----------|--------|--------|---------|---------|---------|---------------|--------|--------|
| Kansas<br>harvest<br>sorghum | 15-Oct-14 | T     | MOUDI-DFT | DFT+   | DFT-   | IS      | IS+     | IS-     | LOG(DFT/IS)   |        |        |
|                              |           |       |           |        |        |         |         |         |               |        |        |
|                              |           |       |           | -9.0   | 0.350  | 0.340   | 0.340   | 0.104   | 0.059         | 0.042  | 0.528  |
|                              |           |       |           | -10.0  | 1.140  | 0.854   | 0.854   | 0.174   | 0.083         | 0.066  | 0.816  |
|                              |           |       |           | -11.0  | 1.140  | 0.854   | 0.854   | 0.228   | 0.103         | 0.086  | 0.700  |
|                              |           |       |           | -12.0  | 1.140  | 0.854   | 0.854   | 0.415   | 0.192         | 0.175  | 0.439  |
|                              |           |       |           | -13.0  | 1.260  | 0.908   | 0.908   | 0.415   | 0.192         | 0.175  | 0.482  |
|                              |           |       |           | -14.0  | 1.260  | 0.908   | 0.908   | 0.519   | 0.259         | 0.242  | 0.385  |
|                              |           |       |           | -13.0  | 1.260  | 0.908   | 0.908   | 0.295   | 0.536         | 0.196  | 0.631  |
|                              |           |       |           | -14.0  | 1.260  | 0.908   | 0.908   | 0.400   | 0.587         | 0.247  | 0.498  |
|                              |           |       |           | -15.0  | 1.260  | 0.908   | 0.908   | 0.509   | 0.635         | 0.296  | 0.394  |
|                              |           |       |           | -16.0  | 1.260  | 0.908   | 0.908   | 0.509   | 0.635         | 0.296  | 0.394  |
|                              |           |       |           | -17.0  | 1.260  | 0.908   | 0.908   | 0.622   | 0.683         | 0.343  | 0.307  |
|                              |           |       |           | -18.0  | 1.580  | 1.136   | 1.136   | 0.989   | 0.822         | 0.482  | 0.203  |
|                              |           |       |           | -19.0  | 1.580  | 1.136   | 1.136   | 2.698   | 1.392         | 1.053  | -0.232 |
|                              |           |       |           | -20.0  | 1.910  | 1.358   | 1.358   | 3.483   | 1.660         | 1.320  | -0.261 |
|                              |           |       |           | -21.0  | 2.020  | 1.402   | 1.402   | 5.900   | 10.714        | 3.923  | -0.466 |
|                              |           |       |           | -22.0  | 2.160  | 1.447   | 1.447   | 10.000  | 12.707        | 5.917  | -0.666 |
|                              |           |       |           | -23.0  | 2.490  | 1.503   | 1.503   | 57.000  | 29.303        | 22.305 | -1.360 |
|                              |           |       |           | -24.0  | 4.030  | 1.689   | 1.689   | 86.000  | 211.495       | 62.475 | -1.329 |
|                              |           | -25.0 | 8.790     | 2.870  | 2.870  | 180.000 | 259.082 | 110.061 | -1.311        |        |        |
|                              |           | -26.0 | 14.550    | 4.683  | 4.683  | 330.000 | 323.840 | 174.819 | -1.356        |        |        |
| CRC                          | 11-May-16 | T     | CRAFT     | CRAFT+ | CRAFT- | IS      | IS+     | IS-     | LOG(CRAFT/IS) |        |        |
|                              |           |       |           |        |        |         |         |         |               |        |        |
|                              |           |       |           | -13.0  | 0.005  | 0.012   | 0.003   | 0.002   | 0.009         | 0.002  | 0.333  |
|                              |           |       |           | -14.0  | 0.007  | 0.013   | 0.005   | 0.002   | 0.009         | 0.002  | 0.514  |
|                              |           |       |           | -15.0  | 0.015  | 0.016   | 0.008   | 0.009   | 0.013         | 0.006  | 0.197  |
|                              |           |       |           | -16.0  | 0.023  | 0.019   | 0.011   | 0.009   | 0.013         | 0.006  | 0.389  |
|                              |           |       |           | -17.0  | 0.041  | 0.025   | 0.016   | 0.020   | 0.018         | 0.010  | 0.297  |
|                              |           |       |           | -18.0  | 0.099  | 0.041   | 0.033   | 0.035   | 0.023         | 0.016  | 0.454  |
|                              |           |       |           | -19.0  | 0.188  | 0.068   | 0.059   | 0.070   | 0.037         | 0.030  | 0.429  |
|                              |           |       |           | -20.0  | 0.432  | 0.192   | 0.184   | 0.167   | 0.139         | 0.081  | 0.413  |
|                              |           |       |           | -21.0  | 0.463  | 1.175   | 0.337   | 0.291   | 0.181         | 0.124  | 0.202  |
|                              |           |       |           | -22.0  | 1.195  | 1.529   | 0.691   | 0.858   | 1.072         | 0.499  | 0.144  |
|                              |           |       |           | -23.0  | 2.822  | 2.111   | 1.273   | 3.195   | 1.547         | 0.974  | -0.054 |
|                              |           |       |           | -24.0  | 6.213  | 3.087   | 2.249   | 4.954   | 2.484         | 1.911  | 0.098  |
|                              |           | -25.0 | 11.118    | 4.422  | 3.584  | 8.454   | 3.769   | 3.197   | 0.119         |        |        |
|                              |           | -26.0 | 20.121    | 7.230  | 6.392  | 13.677  | 6.481   | 5.872   | 0.168         |        |        |
| CRC                          | 12-May-16 | T     | CRAFT     | CRAFT+ | CRAFT- | IS      | IS+     | IS-     | LOG(CRAFT/IS) |        |        |
|                              |           |       |           |        |        |         |         |         |               |        |        |
|                              |           |       |           | -13.0  | 0.002  | 0.010   | 0.002   | 0.002   | 0.007         | 0.001  | 0.126  |
|                              |           |       |           | -14.0  | 0.007  | 0.013   | 0.005   | 0.007   | 0.011         | 0.005  | -0.022 |
|                              |           |       |           | -15.0  | 0.023  | 0.019   | 0.011   | 0.009   | 0.012         | 0.006  | 0.387  |
|                              |           |       |           | -16.0  | 0.028  | 0.021   | 0.013   | 0.022   | 0.016         | 0.010  | 0.113  |
|                              |           |       |           | -17.0  | 0.041  | 0.025   | 0.016   | 0.032   | 0.020         | 0.014  | 0.110  |
|                              |           |       |           | -18.0  | 0.066  | 0.032   | 0.024   | 0.063   | 0.033         | 0.027  | 0.019  |
|                              |           |       |           | -19.0  | 0.094  | 0.040   | 0.031   | 0.128   | 0.070         | 0.064  | -0.135 |
|                              |           |       |           | -20.0  | 0.188  | 0.068   | 0.059   | 0.189   | 0.230         | 0.110  | -0.001 |
|                              |           |       |           | -21.0  | 0.702  | 1.304   | 0.466   | 0.380   | 0.308         | 0.188  | 0.267  |
|                              |           |       |           | -22.0  | 1.451  | 1.633   | 0.795   | 0.888   | 0.499         | 0.379  | 0.213  |
|                              |           |       |           | -23.0  | 2.254  | 1.925   | 1.087   | 1.422   | 0.738         | 0.615  | 0.200  |
|                              |           |       |           | -24.0  | 3.738  | 2.392   | 1.554   | 1.628   | 0.853         | 0.725  | 0.361  |
|                              |           | -25.0 | 6.216     | 3.089  | 2.251  | 5.309   | 5.128   | 2.818   | 0.069         |        |        |
|                              |           | -26.0 | 10.524    | 4.258  | 3.420  | 9.371   | 6.669   | 4.358   | 0.050         |        |        |
|                              |           | -27.0 | 20.132    | 7.234  | 6.396  | 25.182  | 14.644  | 11.668  | -0.097        |        |        |

**Table S2. (continued)**

|       |           |         |           |         |        |        |        |        |               |       |               |
|-------|-----------|---------|-----------|---------|--------|--------|--------|--------|---------------|-------|---------------|
| CSU   | 18-May-16 | T       | CRAFT     | CRAFT+  | CRAFT- | IS     | IS+    | IS-    | LOG(CRAFT/IS) |       |               |
|       |           | -8.0    | 0.002     | 0.010   | 0.002  | 0.025  | 0.022  | 0.013  | -1.160        |       |               |
|       |           | -9.0    | 0.007     | 0.013   | 0.005  | 0.098  | 0.051  | 0.042  | -1.261        |       |               |
|       |           | -10.0   | 0.012     | 0.015   | 0.007  | 0.156  | 0.080  | 0.071  | -1.229        |       |               |
|       |           | -11.0   | 0.017     | 0.017   | 0.009  | 0.156  | 0.080  | 0.071  | -1.073        |       |               |
|       |           | -12.0   | 0.034     | 0.023   | 0.015  | 0.168  | 0.298  | 0.112  | -0.804        |       |               |
|       |           | -13.0   | 0.047     | 0.027   | 0.018  | 0.168  | 0.298  | 0.112  | -0.663        |       |               |
|       |           | -14.0   | 0.058     | 0.030   | 0.021  | 0.229  | 0.329  | 0.142  | -0.708        |       |               |
|       |           | -15.0   | 0.079     | 0.036   | 0.027  | 0.229  | 0.329  | 0.142  | -0.574        |       |               |
|       |           | -16.0   | 0.118     | 0.046   | 0.038  | 0.361  | 0.387  | 0.201  | -0.601        |       |               |
|       |           | -17.0   | 0.156     | 0.057   | 0.049  | 0.352  | 0.399  | 0.201  | -0.466        |       |               |
|       |           | -18.0   | 0.278     | 0.103   | 0.095  | 0.428  | 0.431  | 0.233  | -0.301        |       |               |
|       |           | -19.0   | 0.229     | 1.027   | 0.189  | 0.509  | 0.464  | 0.266  | -0.461        |       |               |
|       |           | -20.0   | 0.463     | 1.175   | 0.337  | 0.509  | 0.464  | 0.266  | -0.155        |       |               |
|       |           | -21.0   | 0.702     | 1.304   | 0.466  | 0.509  | 0.483  | 0.272  | 0.025         |       |               |
|       |           | -22.0   | 1.196     | 1.530   | 0.691  | 0.812  | 0.604  | 0.393  | 0.054         |       |               |
|       |           | -23.0   | 3.120     | 2.205   | 1.367  | 1.379  | 0.831  | 0.620  | 0.241         |       |               |
|       |           | -24.0   | 6.620     | 3.199   | 2.360  | 3.575  | 2.168  | 1.916  | 0.154         |       |               |
|       |           | -25.0   | 11.124    | 4.425   | 3.586  | 7.224  | 8.657  | 4.245  | 0.074         |       |               |
|       |           | -26.0   | 16.595    | 6.047   | 5.209  | 15.970 | 13.469 | 8.353  | -0.097        |       |               |
|       |           | -27.0   | 43.230    | 19.237  | 18.398 | 27.586 | 19.757 | 14.032 | 0.081         |       |               |
|       |           | CSU     | 19-May-16 | T       | CRAFT  | CRAFT+ | CRAFT- | IS     | IS+           | IS-   | LOG(CRAFT/IS) |
|       |           |         |           | -11.0   | 0.020  | 0.018  | 0.010  | 0.005  | 0.012         | 0.004 | 0.598         |
|       |           |         |           | -12.0   | 0.031  | 0.022  | 0.014  | 0.005  | 0.012         | 0.004 | 0.796         |
|       |           |         |           | -13.0   | 0.058  | 0.030  | 0.021  | 0.010  | 0.015         | 0.007 | 0.745         |
|       |           |         |           | -14.0   | 0.124  | 0.048  | 0.040  | 0.031  | 0.023         | 0.015 | 0.604         |
|       |           |         |           | -15.0   | 0.188  | 0.068  | 0.059  | 0.045  | 0.029         | 0.020 | 0.623         |
| -16.0 | 0.229     |         |           | 1.027   | 0.189  | 0.080  | 0.042  | 0.034  | 0.459         |       |               |
| -17.0 | 0.463     |         |           | 1.175   | 0.337  | 0.099  | 0.052  | 0.043  | 0.669         |       |               |
| -18.0 | 0.946     |         |           | 1.421   | 0.582  | 0.139  | 0.073  | 0.064  | 0.833         |       |               |
| -19.0 | 0.946     |         |           | 1.421   | 0.582  | 0.256  | 0.335  | 0.154  | 0.567         |       |               |
| -20.0 | 1.980     |         |           | 1.830   | 0.992  | 0.256  | 0.335  | 0.154  | 0.888         |       |               |
| -21.0 | 2.824     |         |           | 2.112   | 1.274  | 0.312  | 0.376  | 0.183  | 0.956         |       |               |
| -22.0 | 3.425     |         |           | 2.298   | 1.460  | 0.551  | 0.477  | 0.284  | 0.794         |       |               |
| -23.0 | 6.216     |         |           | 3.089   | 2.251  | 1.648  | 0.926  | 0.733  | 0.577         |       |               |
| -24.0 | 8.895     | 3.813   | 2.975     | 2.474   | 1.464  | 1.234  | 0.556  |        |               |       |               |
| -25.0 | 11.956    | 15.297  | 6.913     | 8.335   | 7.987  | 4.439  | 0.157  |        |               |       |               |
| -26.0 | 25.355    | 20.192  | 11.808    | 9.895   | 9.339  | 5.303  | 0.409  |        |               |       |               |
| CSU   | 6-Sep-13  | T       | CS        | CS+     | CS-    | IS     | IS+    | IS-    | LOG(CS/IS)    |       |               |
|       |           | -15     | 0.584     | 0.584   | 0.292  | 0.567  | 0.331  | 0.245  | -0.013        |       |               |
|       |           | -16     | 0.806     | 1.122   | 0.469  | 0.621  | 0.351  | 0.266  | -0.113        |       |               |
|       |           | -17     | 1.163     | 1.876   | 0.718  | 1.545  | 1.732  | 0.874  | 0.123         |       |               |
|       |           | -18     | 2.017     | 3.257   | 1.246  | 2.236  | 2.014  | 1.156  | 0.045         |       |               |
|       |           | -19     | 2.697     | 4.820   | 1.729  | 3.411  | 2.462  | 1.604  | 0.102         |       |               |
|       |           | -21     | 11.097    | 17.508  | 6.792  | 8.567  | 4.478  | 3.620  | -0.112        |       |               |
|       |           | -22     | 21.839    | 44.909  | 14.693 | 15.670 | 17.416 | 8.835  | -0.144        |       |               |
|       |           | -23     | 33.488    | 76.010  | 23.246 | 26.778 | 21.857 | 13.276 | -0.097        |       |               |
| CSU   | 12-Nov-13 | T       | CS-Bio    | CS+     | CS-    | IS-Bio | IS+    | IS-    | LOG(CS/IS)    |       |               |
|       |           | -12.0   | 0.954     | 0.954   | 0.477  | 0.364  | 0.163  | 0.146  | 0.418         |       |               |
|       |           | -13.0   | 1.258     | 1.833   | 0.746  | 0.514  | 0.754  | 0.318  | 0.389         |       |               |
|       |           | -14.0   | 1.693     | 2.318   | 0.978  | 0.653  | 0.816  | 0.380  | 0.413         |       |               |
|       |           | -15.0   | 2.712     | 3.340   | 1.497  | 0.653  | 0.816  | 0.380  | 0.618         |       |               |
|       |           | -16.0   | 3.781     | 7.196   | 2.479  | 2.299  | 1.405  | 0.969  | 0.216         |       |               |
|       |           | -17.0   | 7.550     | 11.301  | 4.526  | 3.277  | 1.726  | 1.290  | 0.362         |       |               |
|       |           | -18.0   | 12.922    | 19.174  | 7.720  | 4.631  | 2.187  | 1.751  | 0.446         |       |               |
|       |           | -19.0   | 20.698    | 29.290  | 12.128 | 4.631  | 2.187  | 1.751  | 0.650         |       |               |
|       |           | -20.0   | 24.259    | 33.646  | 14.096 | 10.126 | 4.632  | 4.196  | 0.379         |       |               |
|       |           | -21.0   | 39.027    | 64.816  | 24.360 | 19.965 | 21.915 | 11.014 | 0.291         |       |               |
|       |           | -22.0   | 75.870    | 115.796 | 45.837 | 27.063 | 24.670 | 13.769 | 0.448         |       |               |
| -23.0 | 138.679   | 189.600 | 80.095    | 51.655  | 33.204 | 22.303 | 0.429  |        |               |       |               |
| -24.0 | 181.408   | 208.552 | 97.018    | 195.255 | 86.523 | 75.622 | -0.032 |        |               |       |               |



**Table S2. (continued)**

|       |           |          |           |         |         |         |        |        |             |
|-------|-----------|----------|-----------|---------|---------|---------|--------|--------|-------------|
| CSU   | 12-Nov-13 | T        | MOUDI-DFT | DFT+    | DFT-    | IS-Bio  | IS+    | IS-    | LOG(DFT/IS) |
|       |           | -10.0    | 0.118     | 0.116   | 0.116   | 0.179   | 0.085  | 0.068  | -0.180      |
|       |           | -11.0    | 0.200     | 0.198   | 0.198   | 0.320   | 0.142  | 0.124  | -0.203      |
|       |           | -12.0    | 0.508     | 0.423   | 0.423   | 0.364   | 0.163  | 0.146  | 0.145       |
|       |           | -13.0    | 0.710     | 0.622   | 0.622   | 0.514   | 0.754  | 0.318  | 0.141       |
|       |           | -14.0    | 0.891     | 0.801   | 0.801   | 0.653   | 0.816  | 0.380  | 0.134       |
|       |           | -15.0    | 1.314     | 1.193   | 1.193   | 0.653   | 0.816  | 0.380  | 0.303       |
|       |           | -16.0    | 1.987     | 1.836   | 1.836   | 2.299   | 1.405  | 0.969  | -0.063      |
|       |           | -17.0    | 2.838     | 2.579   | 2.579   | 3.277   | 1.726  | 1.290  | -0.062      |
|       |           | -18.0    | 4.643     | 4.381   | 4.381   | 4.631   | 2.187  | 1.751  | 0.001       |
| CSU   | 13-Nov-13 | T        | CS-Bio    | CS+     | CS-     | IS-Bio  | IS+    | IS-    | LOG(CS/IS)  |
|       |           | -12.0    | 0.499     | 0.682   | 0.288   | 0.163   | 0.075  | 0.069  | 0.486       |
|       |           | -13.0    | 1.010     | 1.873   | 0.656   | 0.330   | 0.255  | 0.156  | 0.486       |
|       |           | -14.0    | 2.686     | 4.921   | 1.737   | 0.459   | 0.299  | 0.200  | 0.767       |
|       |           | -15.0    | 6.192     | 9.914   | 3.811   | 1.763   | 2.587  | 1.090  | 0.546       |
|       |           | -16.0    | 10.297    | 14.612  | 6.040   | 1.953   | 2.674  | 1.177  | 0.722       |
|       |           | -17.0    | 16.744    | 23.844  | 9.837   | 5.625   | 4.066  | 2.569  | 0.474       |
|       |           | -18.0    | 27.020    | 49.350  | 17.460  | 9.487   | 5.346  | 3.849  | 0.455       |
|       |           | -19.0    | 40.174    | 73.178  | 25.936  | 11.494  | 6.006  | 4.509  | 0.543       |
|       |           | -20.0    | 55.401    | 116.584 | 37.555  | 23.015  | 10.228 | 8.731  | 0.382       |
|       |           | -21.0    | 69.563    | 134.262 | 45.822  | 35.055  | 16.064 | 14.567 | 0.298       |
|       |           | -22.0    | 108.495   | 225.122 | 73.212  | 26.920  | 29.928 | 14.679 | 0.605       |
|       |           | -23.0    | 301.880   | 301.880 | 150.940 | 28.820  | 30.662 | 15.413 | 1.020       |
| -24.0 | 276.865   | 497.157  | 177.831   | 66.560  | 43.141  | 27.892  | 0.619  |        |             |
| -25.0 | 335.586   | 420.524  | 186.642   | 119.916 | 58.201  | 42.951  | 0.447  |        |             |
| CSU   | 14-Nov-13 | T        | CS-Bio    | CS+     | CS-     | IS-Bio  | IS+    | IS-    | LOG(CS/IS)  |
|       |           | -18.0    | 4.175     | 5.715   | 2.412   | 1.490   | 2.092  | 0.906  | 0.447       |
|       |           | -19.0    | 5.571     | 9.910   | 3.566   | 2.771   | 2.618  | 1.433  | 0.303       |
|       |           | -21.0    | 12.507    | 13.803  | 6.562   | 8.134   | 4.437  | 3.252  | 0.187       |
|       |           | -22.0    | 21.512    | 55.815  | 15.528  | 9.997   | 5.055  | 3.869  | 0.333       |
|       |           | -23.0    | 33.414    | 64.636  | 22.027  | 17.330  | 7.734  | 6.548  | 0.285       |
|       |           | -24.0    | 64.863    | 97.105  | 38.887  | 26.450  | 12.001 | 10.815 | 0.390       |
|       |           | -25.0    | 138.913   | 289.675 | 93.889  | 53.411  | 35.189 | 23.335 | 0.415       |
| -26.0 | 237.974   | 579.013  | 168.656   | 102.554 | 51.415  | 39.561  | 0.366  |        |             |
| -27.0 | 347.864   | 1135.096 | 266.264   | 167.467 | 75.003  | 63.149  | 0.317  |        |             |
| CSU   | 14-Nov-13 | T        | MOUDI-DFT | DFT+    | DFT-    | IS-Bio  | IS+    | IS-    | LOG(DFT/IS) |
|       |           | -18.0    | 0.470     | 0.269   | 0.269   | 1.490   | 2.092  | 0.906  | -0.501      |
|       |           | -19.0    | 0.770     | 0.400   | 0.400   | 2.771   | 2.618  | 1.433  | -0.556      |
|       |           | -20.0    | 1.300     | 0.577   | 0.577   | 5.233   | 3.483  | 2.297  | -0.605      |
|       |           | -21.0    | 2.167     | 0.786   | 0.786   | 8.134   | 4.437  | 3.252  | -0.574      |
|       |           | -22.0    | 3.961     | 1.354   | 1.354   | 9.997   | 5.055  | 3.869  | -0.402      |
|       |           | -23.0    | 6.533     | 2.124   | 2.124   | 17.330  | 7.734  | 6.548  | -0.424      |
|       |           | -24.0    | 11.187    | 3.750   | 3.750   | 26.450  | 12.001 | 10.815 | -0.374      |
|       |           | -25.0    | 19.657    | 7.929   | 7.929   | 53.411  | 35.189 | 23.335 | -0.434      |
|       |           | -26.0    | 23.834    | 10.783  | 10.783  | 102.554 | 51.415 | 39.561 | -0.634      |
| -27.0 | 28.450    | 11.128   | 11.128    | 167.467 | 75.003  | 63.149  | -0.770 |        |             |

**Table S3.** Correction factors,  $f_{nu,1mm}$  and  $f_{nu,0.25-0.10mm}$ , applied to MOUDI-DFT samples collected at CSU.  $\mu = N_u(T)/N_o$ , where  $N_u(T)$  is the number of unfrozen droplets at temperature T in the freezing experiment and  $N_o$  is the total number of droplets in the freezing experiment.

| MOUDI Stage | $f_{nu,0.25mm-0.1mm}$                             | $f_{nu,1mm}$ , with uncertainty (+/-)  |
|-------------|---------------------------------------------------|----------------------------------------|
| 2           | $0.1225\exp(-11\mu) + 1.065\exp(-0.06412\mu)$     | 0.74, + 0.2, -0.13                     |
| 3           | $0.04718\exp(-14.15\mu)+1.023\exp(-0.02347\mu)$   | 0.72, +0.8, -0.8<br>0.65, +0.03, -0.07 |
| 4           | $0.04252\exp(-13.06\mu) + 1.024\exp(-0.02386\mu)$ | 1.18, +0.10, -0.15                     |
| 5           | $0.03023\exp(-14.97\mu) + 1.015\exp(-0.01515\mu)$ | 0.97, +0.03, -0.10                     |
| 6           | $0.5799\exp(-10.57\mu) + 1.148\exp(-0.1408\mu)$   | 0.75, +0.19, -0.02                     |
| 7           | $0.1151\exp(-10.66\mu) + 1.072\exp(-0.07029\mu)$  | 0.84, +0.07, -0.11                     |
| 8           | $1.03\exp(-12.79\mu) + 1.268\exp(-0.2422\mu)$     | 1.01, +0.03, -0.12                     |

**Table S4.** Correction factors,  $f_{nu,1mm}$  and  $f_{nu,0.25-0.10mm}$ , applied to samples collected in Kansas.  $\mu = N_u(T)/N_o$ , where  $N_u(T)$  is the number of unfrozen droplets at temperature T in the freezing experiment and  $N_o$  is the total number of droplets in the freezing experiment.

| MOUDI Stage | $f_{nu,0.25mm-0.1mm}$                             | $f_{nu,1mm}$ with uncertainty (+/-)    |
|-------------|---------------------------------------------------|----------------------------------------|
| 2           | $0.6505\exp(-7.33\mu) + 1.234\exp(-0.2126\mu)$    | 3.18, +0.38, -1.03                     |
| 3           | $0.04718\exp(-14.15\mu)+1.023\exp(-0.02347\mu)$   | 0.72, +0.8, -0.8<br>0.65, +0.03, -0.07 |
| 4           | $0.04252\exp(-13.06\mu) + 1.024\exp(-0.02386\mu)$ | 1.18, +0.10, -0.15                     |
| 5           | $0.03023\exp(-14.97\mu) + 1.015\exp(-0.01515\mu)$ | 0.97, +0.03, -0.10                     |
| 6           | $0.5799\exp(-10.57\mu) + 1.148\exp(-0.1408\mu)$   | 0.75, +0.19, -0.02                     |
| 7           | $0.1151\exp(-10.66\mu) + 1.072\exp(-0.07029\mu)$  | 0.84, +0.07, -0.11                     |
| 8           | $1.03\exp(-12.79\mu) + 1.268\exp(-0.2422\mu)$     | 1.01, +0.03, -0.12                     |

**Table S5a:** Correction factors,  $f_{nu,1mm}$  applied to sample M27 (August 17, 2011) collected at the Manitou Experimental Forest Observatory. Only stages overlapping with the CFDC size range were analyzed in this case.

| MOUDI Stage | Slide Offset | $f_{nu,1mm}$ lower limit | $f_{nu,1mm}$ upper limit |
|-------------|--------------|--------------------------|--------------------------|
| 4           | 0.5 mm       | 11.0                     | 29.922                   |
| 5           | 0.5 mm       | 27.304                   | 51.821                   |
| 6           | 0.5 mm       | 5.29                     | 6.273                    |
| 8           | 0 mm         | 1.421                    | 1.829                    |

**Table S5b:** Correction factors,  $f_{nu,1mm}$  applied to sample M28 (August 18, 2011) collected at the Manitou Experimental Forest Observatory. Only stages overlapping with the CFDC size range were analyzed in this case.

| MOUDI Stage | Slide Offset | $f_{nu,1mm}$ lower limit | $f_{nu,1mm}$ upper limit |
|-------------|--------------|--------------------------|--------------------------|
| 4           | 1.5 mm       | 1.217                    | 1.724                    |
| 5           | 2 mm         | 0.73                     | 0.843                    |
| 6           | 1.5 mm       | 1.045                    | 1.167                    |
| 8           | 2 mm         | 0.893                    | 1.077                    |
